# Supplementary material for: On the atmospheric budget of ethylene dichloride and its impact on stratospheric chlorine and ozone (2002–2020)
Source: Copernicus journal article supplement (doi:10.5194/egusphere-2024-560), 2024-03-12
Supplement: Supplementary file 1 [file egusphere-2024-560-supplement.pdf]

# Supporting Information for “On the atmospheric budget of ethylene dichloride and its impact on stratospheric chlorine and ozone (2002-2020)”

5 Ryan Hossaini<sup>1</sup>, David Sherry<sup>2</sup>, Zihao Wang<sup>3,4</sup>, Martyn P. Chipperfield<sup>3,5</sup>, Wuhu Feng<sup>3,6</sup>, David E. Oram<sup>7,8</sup>, Karina E. Adcock<sup>8</sup>, Stephen A. Montzka<sup>9</sup>, Isobel J. Simpson<sup>10</sup>, Andrea Mazzeo<sup>1</sup>, Amber A. Leeson<sup>1</sup>, Elliot Atlas<sup>11</sup>, and Charles C.-K Chou<sup>12</sup>

<sup>1</sup>Lancaster Environment Centre, Lancaster University, Lancaster, UK.

<sup>2</sup>Nolan Sherry and Associates (NSA), London, UK.

<sup>3</sup>School of Earth and Environment, University of Leeds, Leeds, UK.

10 <sup>4</sup>Department of Ocean Sciences and Engineering, Southern University of Science and Technology, Shenzhen, China.

<sup>5</sup>National Centre for Earth Observation, University of Leeds, Leeds, UK.

<sup>6</sup>National Centre for Atmospheric Science, University of Leeds, Leeds, UK.

<sup>7</sup>National Centre for Atmospheric Science, University of East Anglia, Norwich, UK.

<sup>8</sup>School of Environmental Sciences, University of East Anglia, Norwich, UK.

15 <sup>9</sup>NOAA Global Monitoring Laboratory (GML), Boulder, CO, USA.

<sup>10</sup>Department of Chemistry, University of California-Irvine, Irvine, CA, USA.

<sup>11</sup>Department of Atmospheric Sciences, RSMAS, University of Miami, Miami, Florida, USA.

<sup>12</sup>Research Center for Environmental Changes, Academia Sinica, Taipei, 11529, Taiwan.

*Correspondence to:* Ryan Hossaini ([r.hossaini@lancaster.ac.uk](mailto:r.hossaini@lancaster.ac.uk))

20

25

**Table S1.** Summary statistics (mean and median) of observed and modelled EDC at Bachok and Taiwan. Model data is shown for the scenario sc05 ( $\alpha_1 = 0.5/1.5\%$ ).

| Site   | Year | Sampling months | # obs. | Measured EDC (ppt)  |        | Modelled EDC (ppt)   |        |
|--------|------|-----------------|--------|---------------------|--------|----------------------|--------|
|        |      |                 |        | Mean ( $\pm 1$ s.d) | Median | Mean ( $\pm 1$ s.d)  | Median |
| Bachok | 2014 | Jan/Feb         | 16     | 46.2 ( $\pm 28$ )   | 50.7   | 34.1 ( $\pm 13.0$ )  | 32.4   |
| Bachok | 2015 | Nov/Dec         | 24     | 24.9 ( $\pm 20$ )   | 16.1   | 14.3 ( $\pm 7.0$ )   | 11.6   |
| Bachok | 2016 | Jan             | 17     | 20.9 ( $\pm 15$ )   | 14.0   | 12.2 ( $\pm 5.3$ )   | 10.2   |
| Bachok | 2017 | Jan/Feb/Mar/Apr | 41     | 18.8 ( $\pm 10$ )   | 16.8   | 24.8 ( $\pm 12.9$ )  | 22.1   |
| Bachok | 2018 | Dec             | 2      | 25.6 ( $\pm 14$ )   | 35.5   | 6.4 ( $\pm 7.2$ )    | 11.5   |
| Bachok | 2019 | Jan/Feb         | 26     | 44.4 ( $\pm 48$ )   | 28.7   | 25.0 ( $\pm 16.0$ )  | 19.8   |
| Bachok | 2020 | Dec/Jan/Feb     | 17     | 44.2 ( $\pm 41$ )   | 33.5   | 29.7 ( $\pm 17.0$ )  | 26.3   |
|        |      |                 |        |                     |        |                      |        |
| Taiwan | 2014 | Mar/Apr         | 24     | 137.5 ( $\pm 190$ ) | 82.8   | 120.5 ( $\pm 12.7$ ) | 121.0  |
| Taiwan | 2015 | Mar/Apr         | 23     | 84.3 ( $\pm 83$ )   | 59.0   | 131.4 ( $\pm 20.8$ ) | 128.5  |
| Taiwan | 2016 | Mar/Apr         | 0      | -                   | -      | 125.1 ( $\pm 19.5$ ) | 121.4  |
| Taiwan | 2017 | Apr/May         | 31     | 83.5 ( $\pm 69$ )   | 58.4   | 131.2 ( $\pm 21.6$ ) | 128.5  |
| Taiwan | 2018 | Apr/May/Jun     | 28     | 146.7 ( $\pm 137$ ) | 103.2  | 154.9 ( $\pm 21.5$ ) | 149.4  |
| Taiwan | 2019 | Mar/May         | 52     | 143.5 ( $\pm 127$ ) | 116.9  | 140.2 ( $\pm 19.5$ ) | 139.2  |
| Taiwan | 2020 | Apr/May         | 40     | 102.0 ( $\pm 85$ )  | 63.1   | 136.3 ( $\pm 15.8$ ) | 141.8  |

45 **Table S2.** Observed and modelled EDC abundance (ppt) averaged in 1 km altitude bins during KORUS-AQ.  $n$  denotes the number of measurements in each bin. Median EDC is reported with values in square brackets denoting the 25<sup>th</sup> and 75<sup>th</sup> percentile. The mean bias (MB, model minus observation) is given for each bin. Model results are based on scenario sc05 ( $\alpha_1 = 0.5/1.5\%$ ).

| Altitude bin<br>centre (km) | KORUS-AQ campaign |                           |                           |                 |
|-----------------------------|-------------------|---------------------------|---------------------------|-----------------|
|                             | $n$               | <i>Observed EDC (ppt)</i> | <i>Modelled EDC (ppt)</i> | <i>MB (ppt)</i> |
| <b>0.5</b>                  | 1323              | 68.9 [33.9, 126.6]        | 52.7 [38.7, 71.2]         | -16.2           |
| <b>1.5</b>                  | 573               | 37.2 [22.5, 73.9]         | 45.4 [33.8, 57.7]         | 8.2             |
| <b>2.5</b>                  | 256               | 22.0 [17.5, 36.4]         | 27.7 [20.8, 44.1]         | 5.7             |
| <b>3.5</b>                  | 155               | 18.1 [15.7, 23.7]         | 16.6 [15.4, 18.8]         | -1.5            |
| <b>4.5</b>                  | 119               | 16.0 [14.2, 18.8]         | 15.9 [14.8, 17.0]         | -0.1            |
| <b>5.5</b>                  | 94                | 15.1 [14.0, 18.3]         | 15.5 [14.6, 16.4]         | 0.4             |
| <b>6.5</b>                  | 104               | 15.1 [13.5, 16.7]         | 15.4 [13.9, 17.3]         | 0.3             |
| <b>7.5</b>                  | 160               | 14.7 [12.9, 18.2]         | 14.6 [13.4, 15.7]         | -0.1            |

50

55

60

65

**Table S3.** Comparison of EDC emission estimates (Gg/yr) for parts of East Asia from this work (scenario sc05) and previous studies.

| <b>Study</b>                    | <b>Region</b> | <b>Emission estimate (Gg/yr)</b> | <b>For year</b> | <b>Method</b>                        |
|---------------------------------|---------------|----------------------------------|-----------------|--------------------------------------|
| Wang et al. (2014)              | China         | 121.6 ( $\pm 89$ )               | 2010            | Tracer ratio                         |
| Oram et al. (2017)              | China         | 203 ( $\pm 9$ )                  | 2015            | Tracer ratio                         |
| This work, $\alpha_1=0.5/1.5\%$ | China+Taiwan  | 89 (73-106)                      | 2010            | Bottom-up<br>(see main text Sect. 2) |
| This work. $\alpha_1=0.5/1.5\%$ | China+Taiwan  | 107 (87-127)                     | 2015            | Bottom-up<br>(see main text Sect. 2) |

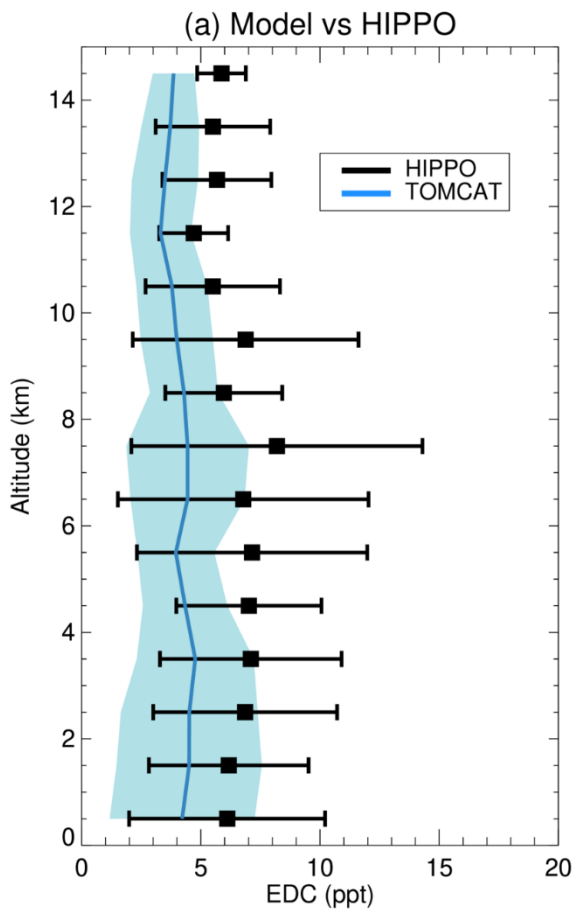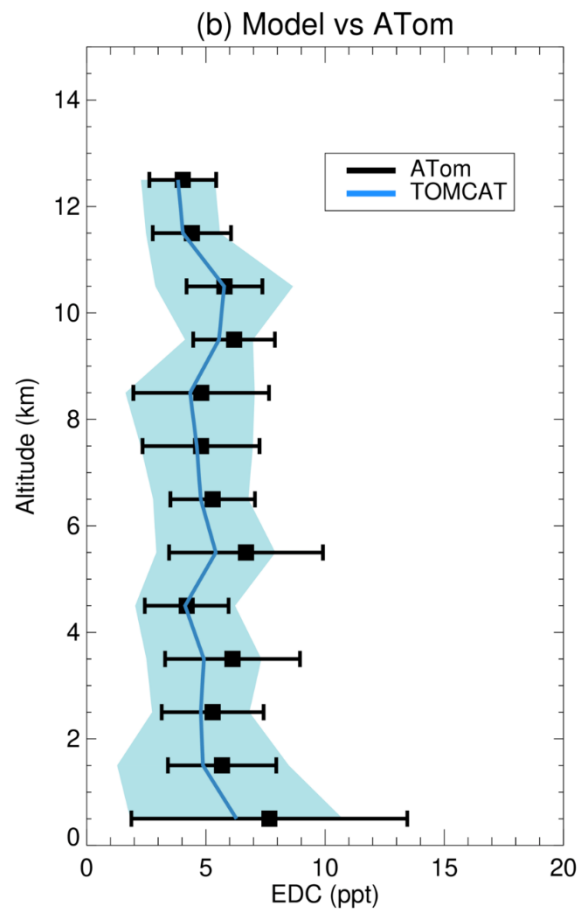

75

**Figure S1.** Tropical ( $\pm 20^\circ$  N/S) mean EDC profiles (ppt) observed during (a) HIPPO and (b) ATom averaged in 1 km altitude bins ( $\pm 1$  s.d). The corresponding model profiles are shown for emission scenario sc05.

80

85

90

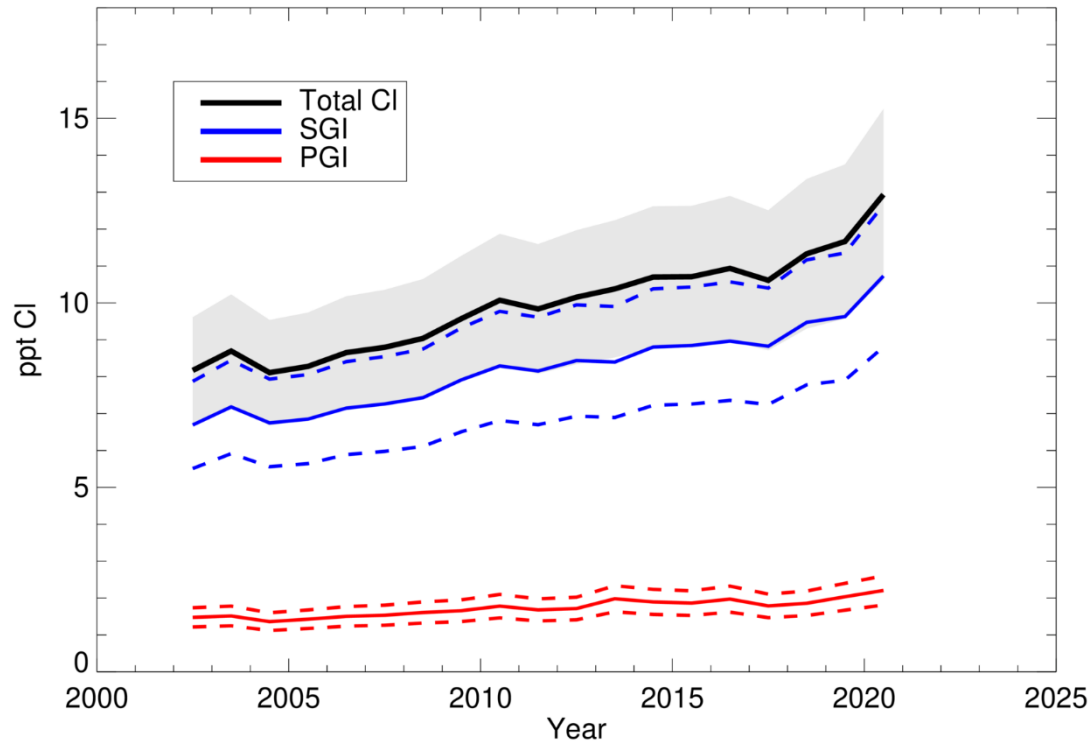

95

**Figure S2.** Modelled annual mean stratospheric chlorine SGI, PGI and total (SGI + PGI) due to EDC (ppt Cl) diagnosed at the tropical tropopause. Solid lines represent results from emission scenario sc05 with shading or dotted lines denoting the range from scenarios sc04 and sc06.

100

105

110

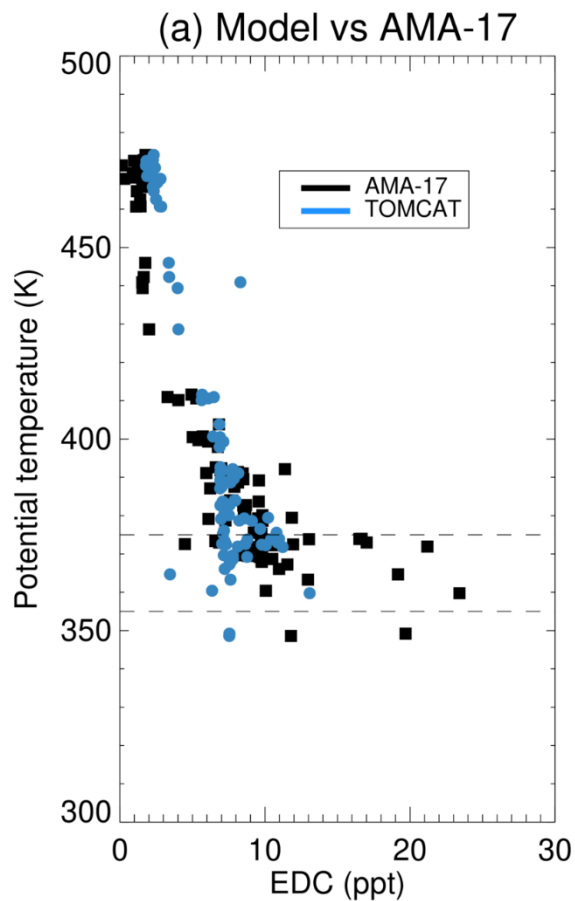

120 **Figure S3.** EDC mole fraction (ppt) vs potential temperature observed during the AMA-17 campaign (Adcock et al., 2021) and corresponding model estimates for emission scenario sc05. The horizontal dashed lines denote the tropopause region (355-375 K).
